# Supplementary material for: Ventricular–ventricular interaction variables correlate with surrogate variables of clinical outcome in children with pulmonary hypertension
Source: PubMed Central journal article supplement — Pulm Circ. 2019 May 29;9(2):2045894019854074. doi: 10.1177/2045894019854074 (PMC6542130; doi:10.1177/2045894019854074), 2019-05-29

## Supplemental Material

### Legends to Supplemental Figures

**Supplemental Figure 1:** Panel A: Association of the sPAP/sSAP ratio with the RVED/LVED area ratio ( $r=0.700$ ,  $p<0.001$ ). Panel B: Association of the sPAP/sSAP ratio and the RA/LA area ratio ( $r =0.735$ ,  $p<0.001$ ). *Abbreviations:* LA, left atrium; LVED, left ventricular end-diastolic area; RA, right atrium; RVED, right ventricular end-diastolic area, sPAP, systolic pulmonary arterial pressure, sSAP, systolic systemic arterial pressure.

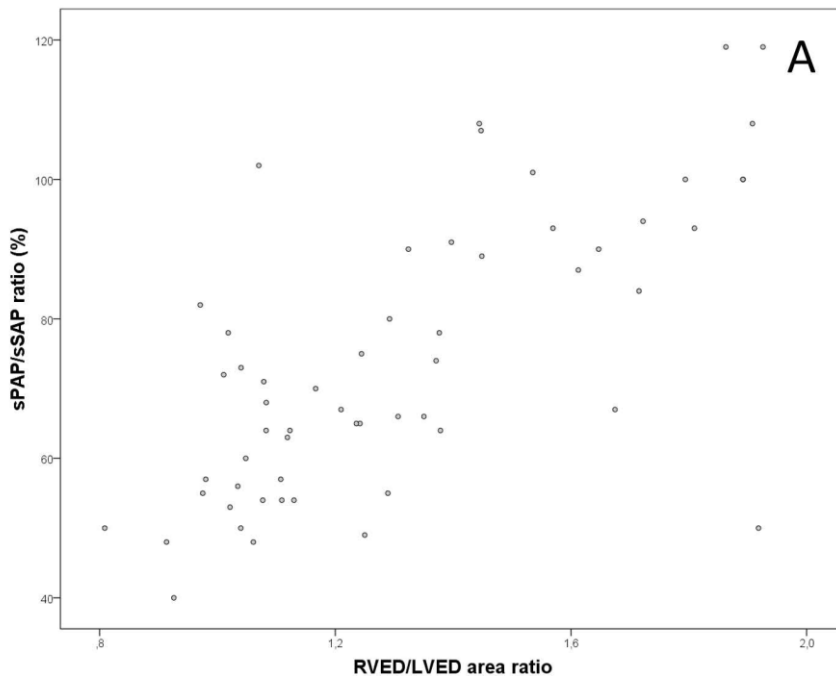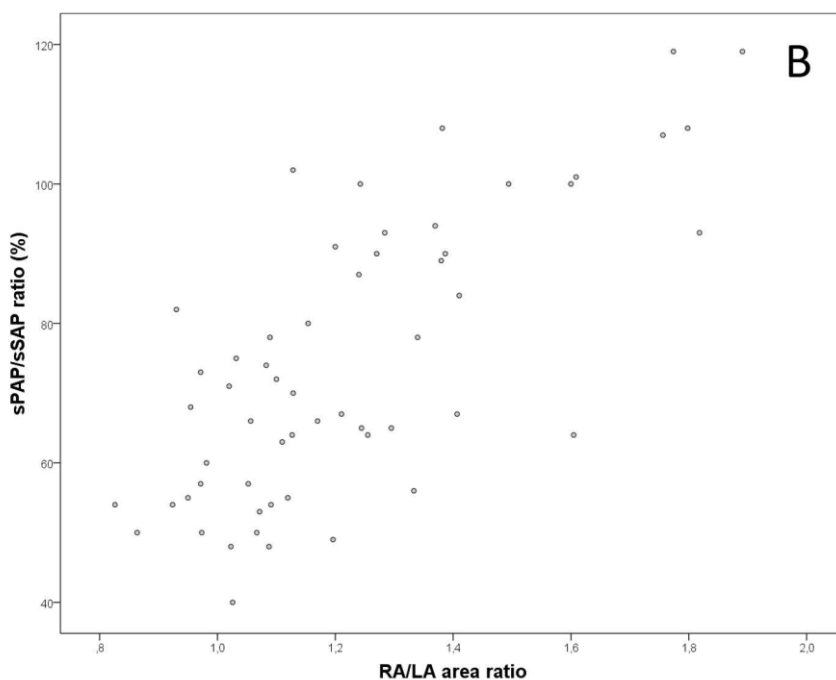

**Supplemental Figure 2:** Panel A: Association of the NT-proBNP with sPAP/sSAP ratio. Panel B: Differences in NT-proBNP values according to the NYHA FC/Ross Score. *Abbreviations:* FC, functional class; sPAP, systolic pulmonary arterial pressure, sSAP, systolic systemic arterial pressure.

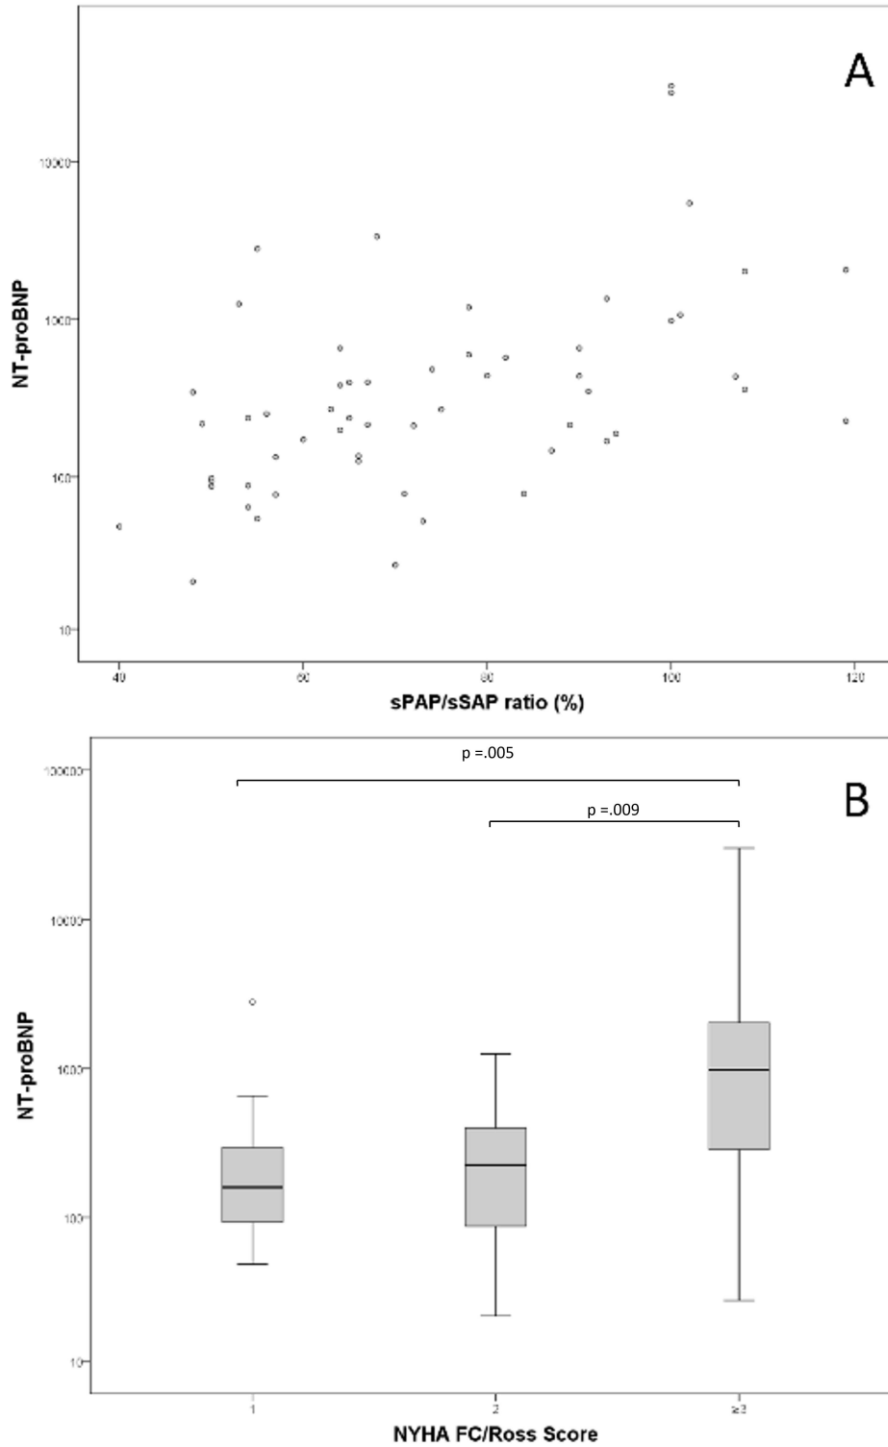

**Supplemental Figure 3:** Forest plot for the correlation of sPAP/sSAP ratio with different parameters. The circle represents the correlation coefficient (Spearman's or Pearson's correlation coefficient, as appropriate). *Abbreviations:* sPAP, systolic pulmonary arterial pressure, sSAP, systolic systemic arterial pressure.

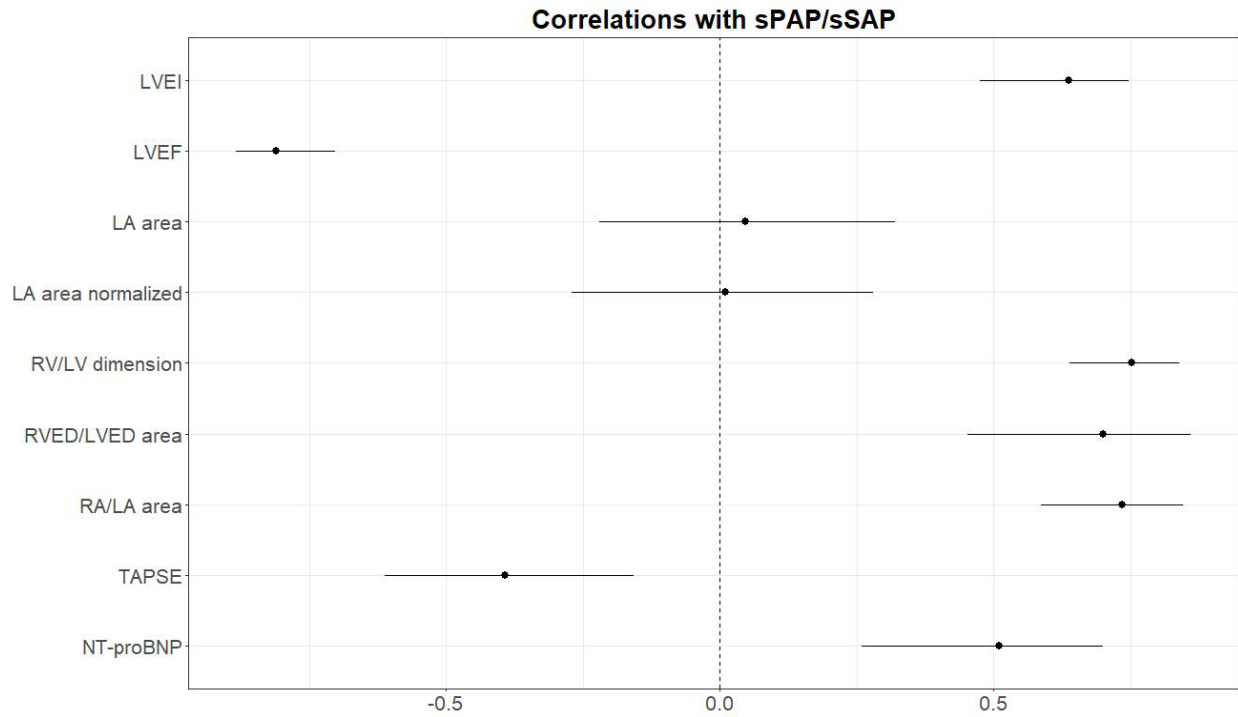

**Supplemental Figure 4:** Forest plot for the correlation of PVRi ratio with different parameters. The circle represents the correlation coefficient (Spearman's or Pearson's correlation coefficient, as appropriate). *Abbreviations:* PVRi, pulmonary vascular resistance index.

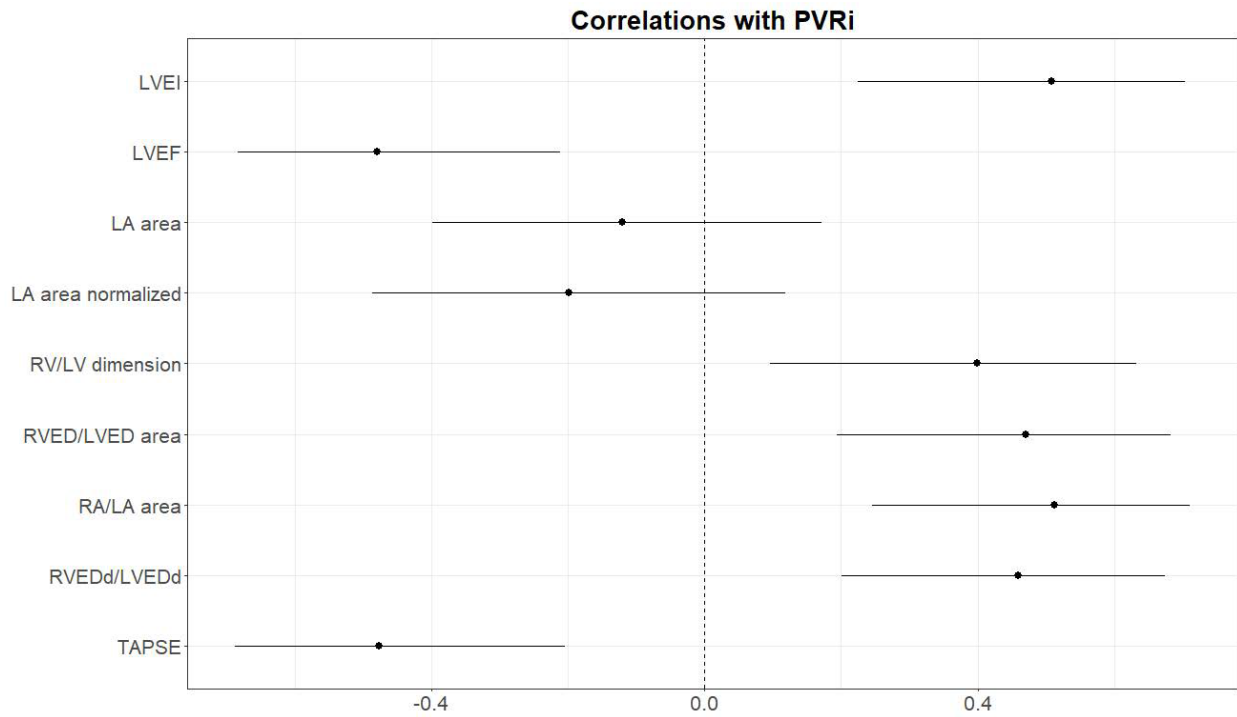

Supplement: Supplemental_Material.pdf [file Supplemental_Material.pdf]
